# Supplementary material
Source: PubMed Central journal article supplement (PMC3359914)
Supplement: supp_mcs052_mcs052supp.pdf [file supp_mcs052_mcs052supp.pdf]

## SUPPLEMENTARY DATA

FIG. S1. Diakinesis chromosomes. (A) Sesquidiploid (AAC,  $2n = 29$ ): three C chromosomes are incorporated in three trivalents (long arrows pointing at the C chromosomes), one C chromosome is part of a heteromorphic bivalent (short arrow) while the other A chromosome is a univalent (A), and five C chromosomes are univalents (arrowheads). (B) Double MAAL with C6 (short arrow) and C8 (long arrow); (C–F) MAALs. (C, D) Carriers of C7 as a univalent (C, arrow) and as part of a trivalent involving two A chromosomes with median/submedian centromeres (D, arrow). (E) C6 (arrow) as part of a trivalent involving two A chromosomes with submedian/subterminal centromeres. (F) C5 (arrow) as part of a pentavalent involving one pair of A chromosomes with median/submedian centromeres (upper) and one pair with submedian/subterminal centromeres (lower). Scale bars = 10  $\mu$ m.

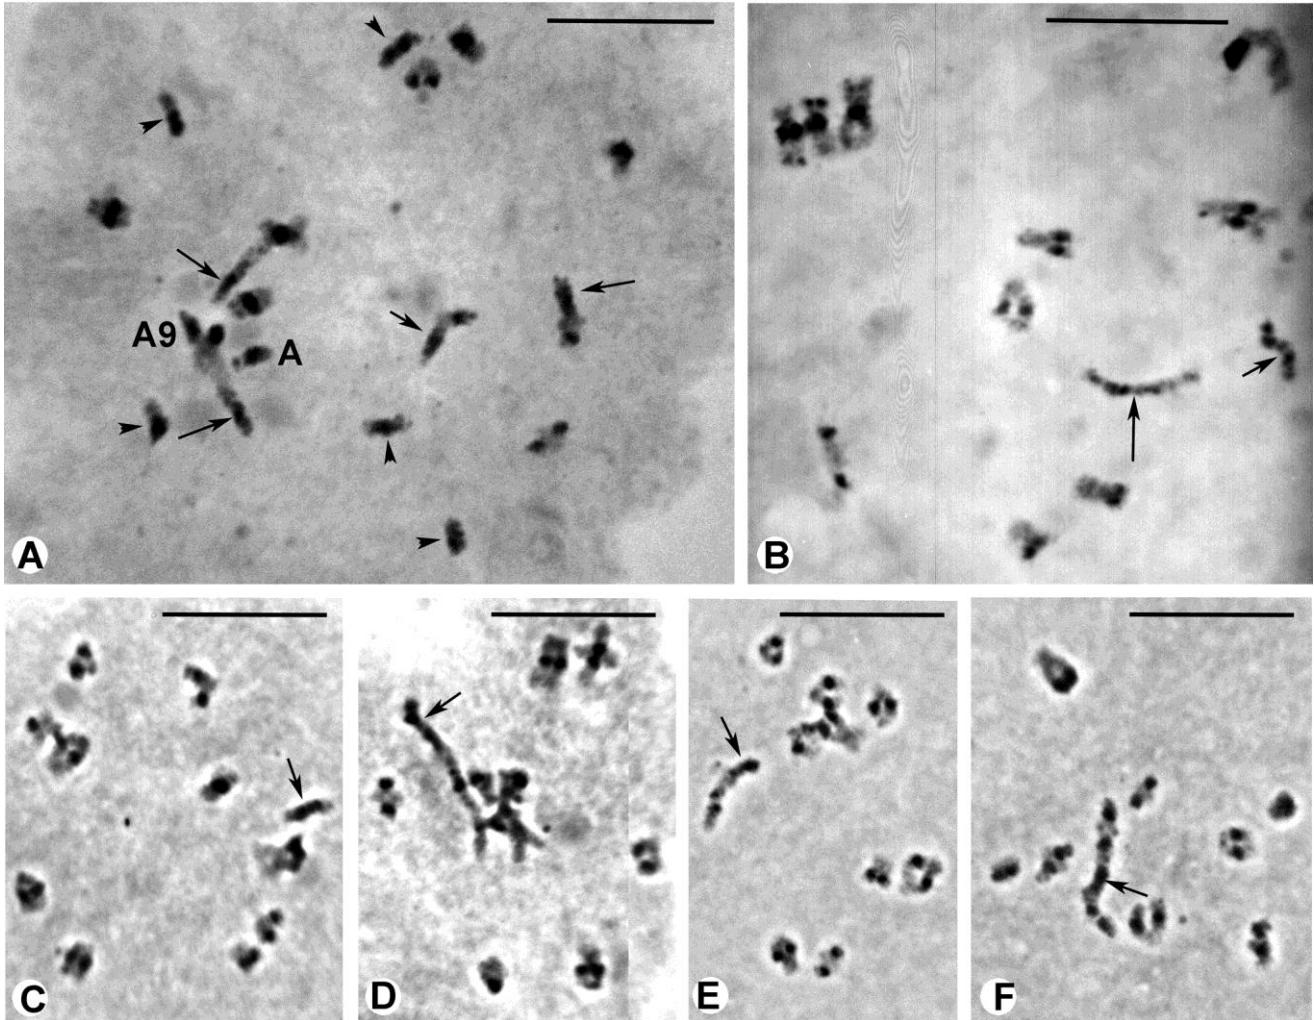

FIG. S2. Examples of chromosome structural changes found in progenies of C4 carrier plants (A–E) and of a substitution in a progeny plant of a C5-carrier (F). (A) Diakinesis of a euploid AA plant with 10 II, with a deleted major part of the short arm of one nucleolar chromosome in the heteromorphic bivalent (arrow). (B) Diakinesis of a plant with a C4 larger than usual, apparently with extra duplicated or translocated C-genome chromosomal material, paired with the nucleolar chromosomes of the A-genome forming a trivalent (arrow). (C–E) Meiosis of a monosomic plant containing C4 and an additional mini-chromosome: (C) metaphase I with C4 as a univalent (arrow) and with the extra mini-chromosome (arrowhead); (D) anaphase I with a lagging C4 (arrow) and a divided mini-chromosome (arrowhead); and (E) a later anaphase I stage with a dividing lagging C4 and separated daughter mini-chromosomes. (F) Diakinesis of a progeny plant with  $2n = 20$  containing a C5 and lacking the homologue to an A chromosome with a submedian/subterminal centromere. Scale bar = 10  $\mu\text{m}$ .

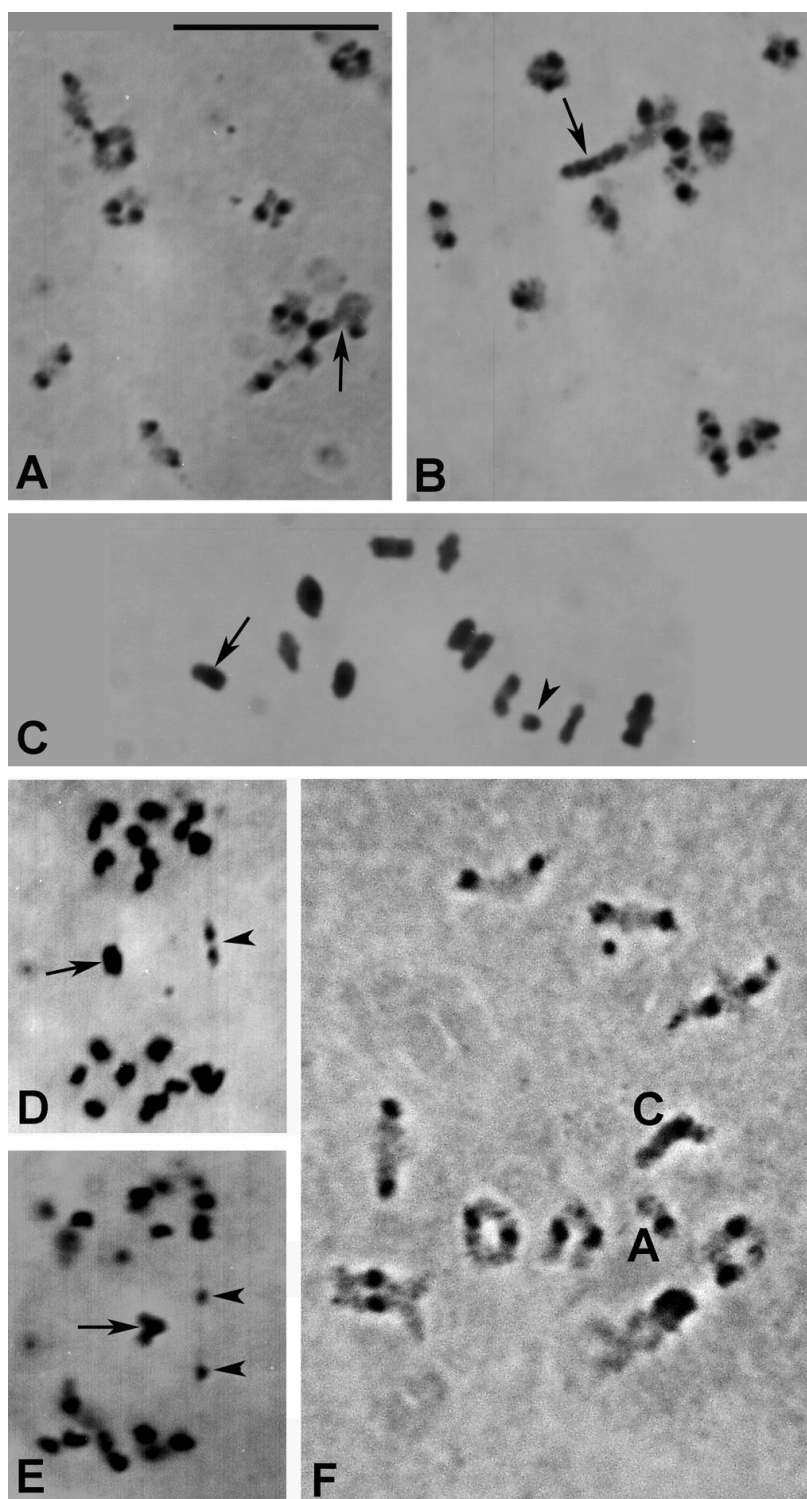

FIG. S3. Identification of the A and C chromosomes after applying two rounds of multiple target FISH (Xiong and Pires, 2011), using in the first round (A, C, F) probes for 5S rDNA (yellow), 45S rDNA (white), repeated DNA sequences in eight chromosome pairs of *B. rapa* by using BAC KBrB072L17 (green), and repeated DNA sequences specific to two pairs of *B. rapa* by using BAC KBrH092N24 (red), and applying in the second round (B, D, F) probes for the repetitive centromeric DNA sequences CentBr1 (white) and CentBr2 (green) and for repetitive DNA sequences that are C-genome specific by using the BAC BNIH 123L05 (red). (A, B) C4 (LG-C3) in a meiotic metaphase I. (C–F) Mitotic metaphase. (C, D) C3d (LG-C5). (E, F) C6 (LG-C6). Scale bar = 10  $\mu$ m.

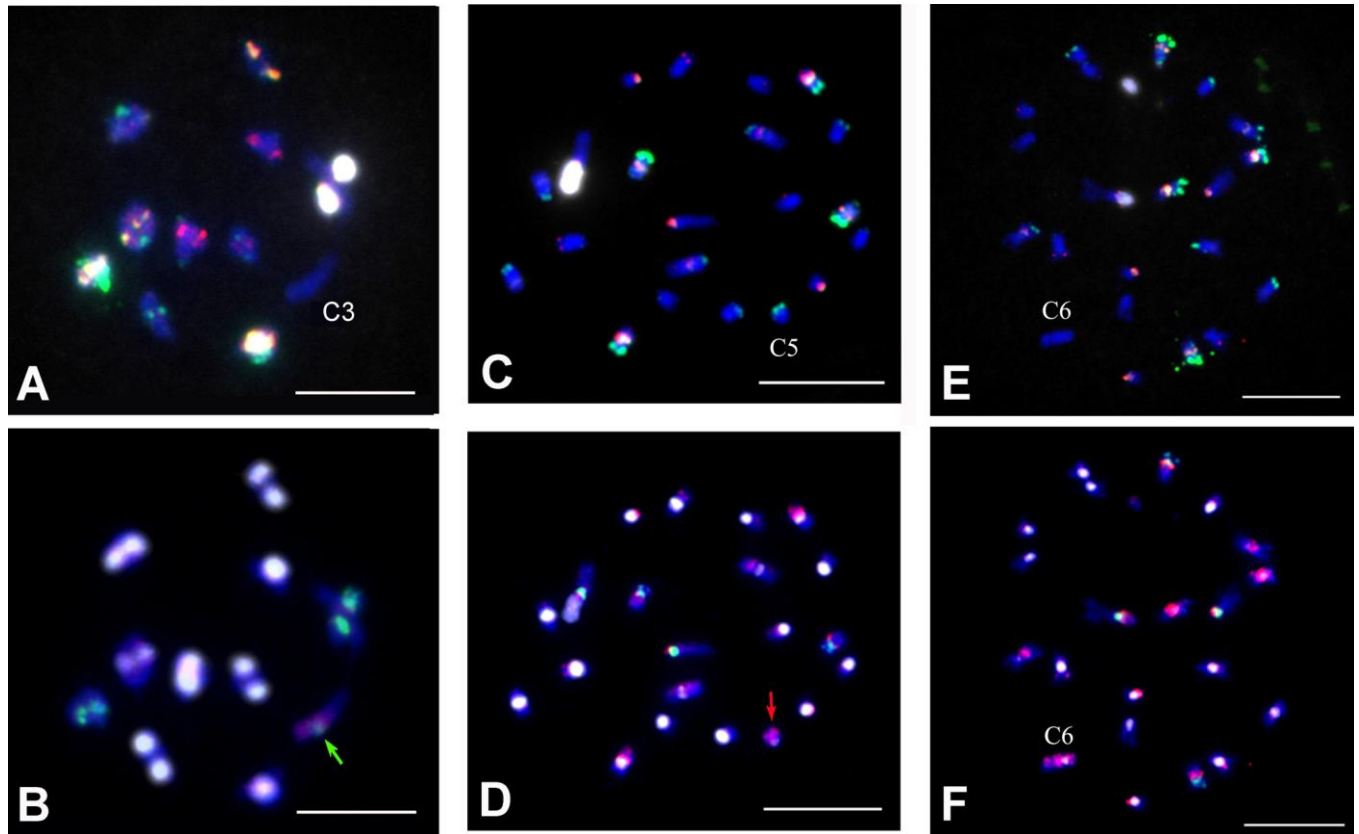

FIG. S4. Chromosomes of *Brassica oleracea* designated by linkage group numerals as depicted in an ideogram by Xiong and Pires (2011) and their corresponding chromosomes of *B. oleracea* var. *alboglabra* designated by cytological numerals in a karyotype by Cheng *et al.* (1995). There is a general correspondence regarding chromosome size and position of the centromere between the ideogram and the karyotype, with the exception of LG-C2, which has a more median centromere compared to its corresponding C7.

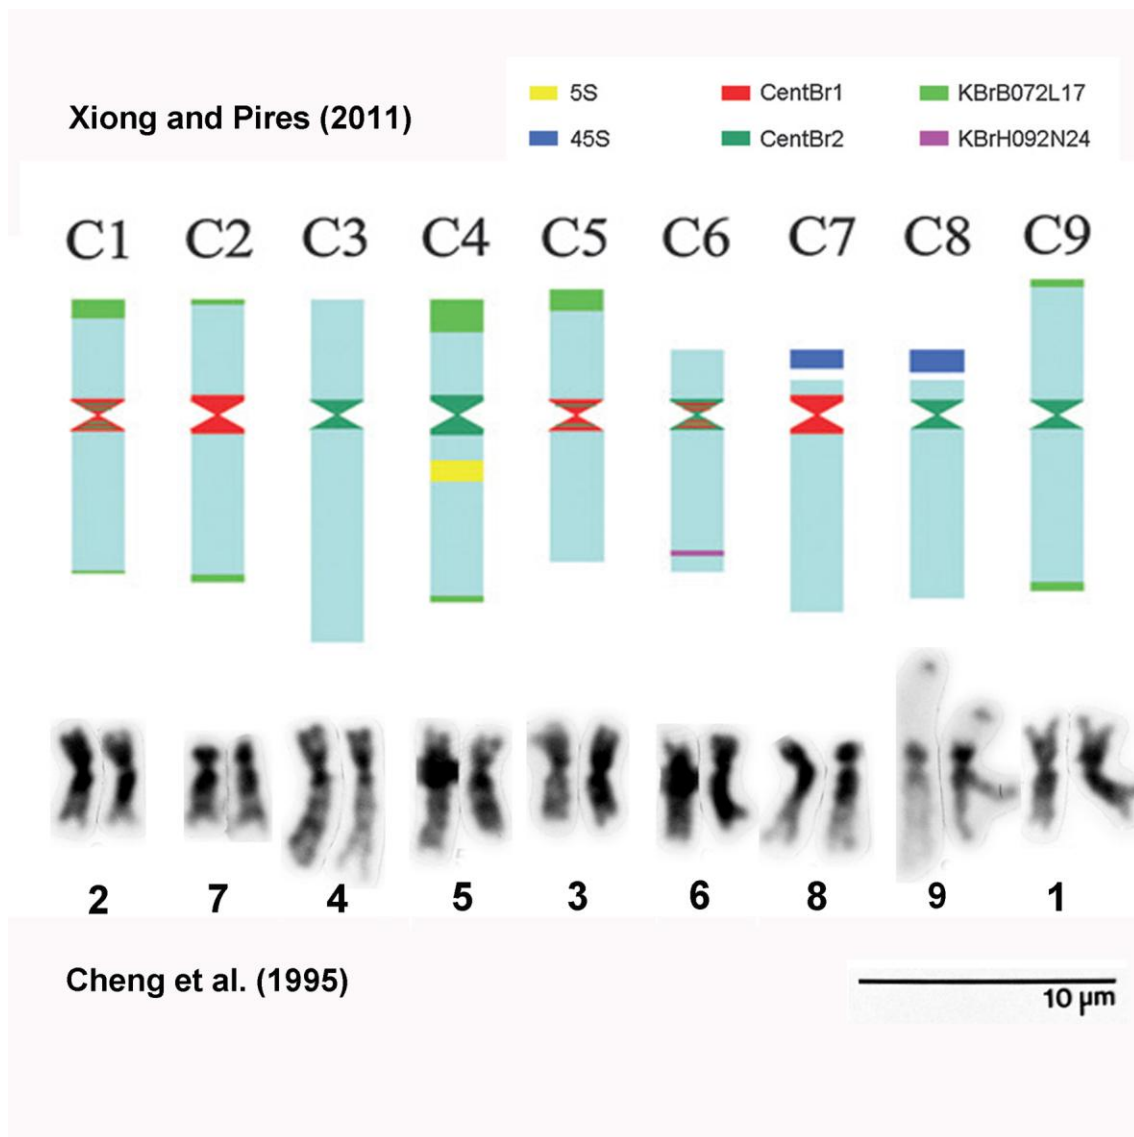

TABLE S1. Accession numbers of the *Brassica* material deposited in the gene bank NordGen in Alnarp, Sweden ([www.nordgen.org](http://www.nordgen.org)) and corresponding linkage groups to the different C-genome chromosomes in the monosomic alien addition lines (MAALs)

| Linkage group | <i>Brassica</i> material                             | Linkage group |
|---------------|------------------------------------------------------|---------------|
| NGB23151      | MAAL for C1                                          | C9            |
| NGB23152      | MAAL for C2                                          | C1            |
| NGB23153      | MAAL for C3d                                         | C5            |
| NGB23154      | MAAL for C4                                          | C3            |
| NGB23155      | MAAL for C4d                                         | C3            |
| NGB23156      | MAAL for C5                                          | C4            |
| NGB23157      | MAAL for C6                                          | C6            |
| NGB23158      | MAAL for C7                                          | C2            |
| NGB23159      | MAAL for C8                                          | C7            |
| NGB23160      | MAAL for C9                                          | C8            |
| NGB23161      | <i>B. rapa</i> var. <i>trilocularis</i> (K-151)      |               |
| NGB23162      | <i>B. oleracea</i> var. <i>alboglabra</i> (No. 4003) |               |
| NGB23163      | <i>B. napus</i> (No. 7406)                           |               |
